# Supplementary material
Source: MDPI journal article supplement (https://www.mdpi.com/2313-0105/9/3/148)
Supplement: s1 [file s1]

# Solid-Electrolyte Interface Formation on Si Nanowires in Li-ion Batteries: The Impact of Electrolyte Additives

Angelo Sarra,<sup>1,#,§</sup> Sergio Brutti,<sup>1,2,3,#</sup> Oriele Palumbo,<sup>1</sup> Francesco Capitani,<sup>4</sup> Ferenc Borondics,<sup>4</sup> Giovanni Battista Appetecchi,<sup>5</sup> Nicholas Carboni,<sup>1</sup> Syed Abdul Ahad,<sup>6</sup> Hugh Geaney,<sup>6</sup> Kevin Ryan,<sup>6</sup> Annalisa Paolone<sup>1,\*</sup>

<sup>1</sup> Consiglio Nazionale delle Ricerche, Istituto dei Sistemi Complessi, Piazzale Aldo Moro 5, 00185 Rome, Italy

<sup>2</sup> Sapienza University of Rome, Department of Chemistry, Piazzale Aldo Moro 5, 00185 Rome, Italy

<sup>3</sup> GISEL-Centro di Riferimento Nazionale per i Sistemi di Accumulo Elettrochimico di Energia, INSTM via G. Giusti 9, 50121 Firenze, Italy

<sup>4</sup> Synchrotron SOLEIL, L'Orme des Merisiers Saint-Aubin, BP 48 91192 Gif-sur-Yvette Cedex, France

<sup>5</sup> Agenzia Nazionale per le Nuove Tecnologie, l'Energia e lo Sviluppo Economico Sostenibile (ENEA), Materials and Physicochemical Processes Technical Unit (SSPT-PROMAS- MATPRO), Via Anguillarese 301, 00123 Rome, Italy

<sup>6</sup> Department of Chemical Sciences and Bernal Institute, University of Limerick, Limerick, Ireland

\* Correspondence: annalisa.paolone@roma1.infn.it

# These authors equally contributed to the manuscript

§ present address: Microscopy Center, University of L'Aquila, via Vetoio, 67100 L'Aquila, Italy

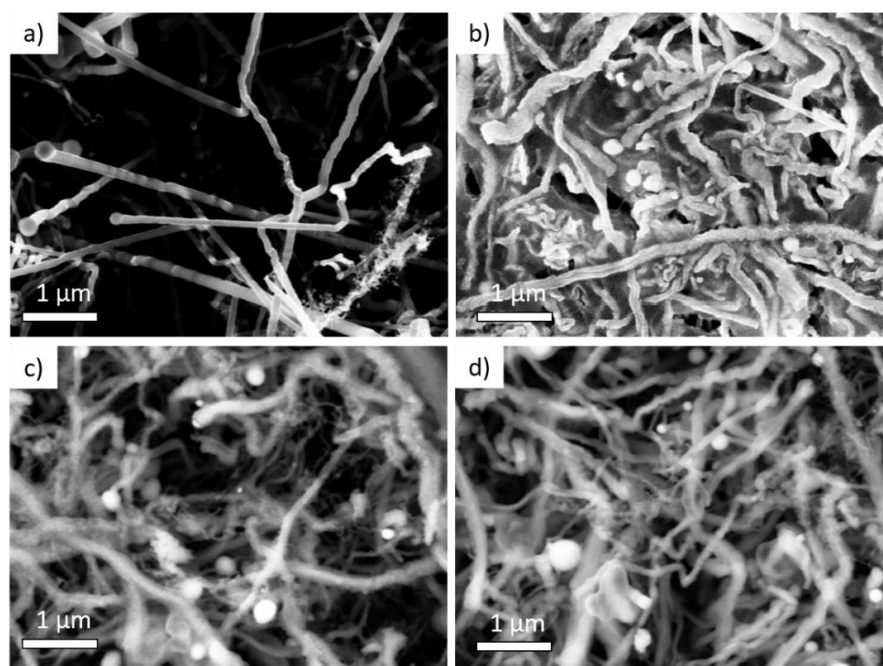

**Figure S1.** Scanning Electron micrographs at high magnification (35000 X) of Si NW electrodes uncycled (a) and after 5 galvanostatic cycles in (b) BE electrolyte, (c) FEC-added electrolyte and (d) VC-added electrolyte.

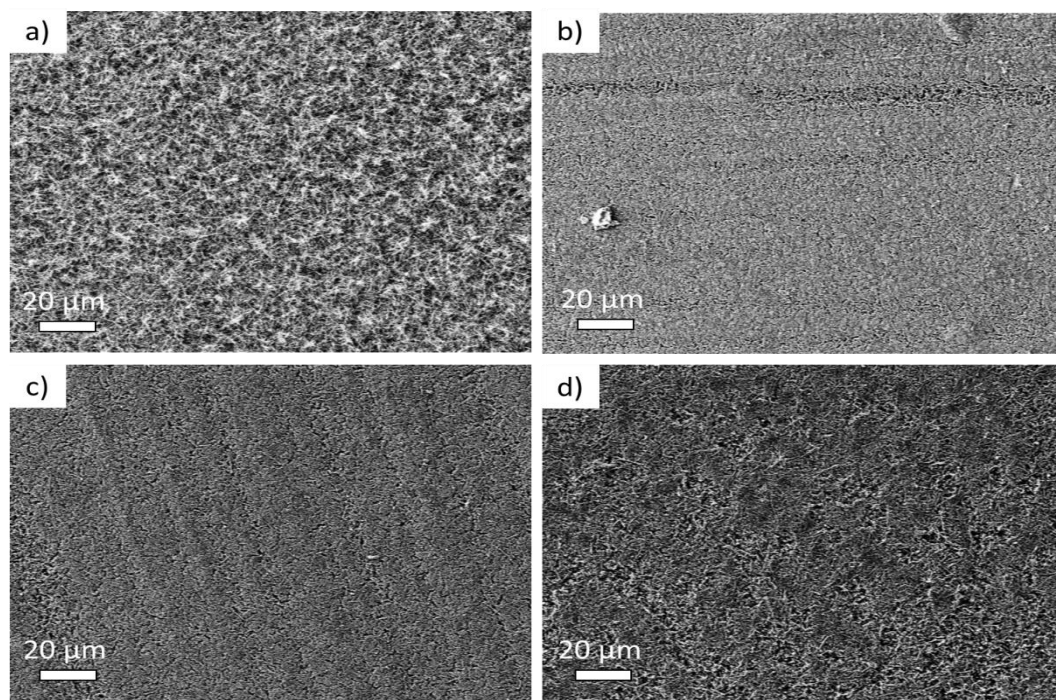

**Figure S2.** Scanning Electron Microscopy low magnification (1000 X) images of (a) pristine Si NW anode, (b) Si NW anode cycled with 1M LiPF<sub>6</sub> electrolyte, (c) added with 3% of fluoroethylene carbonate (FEC) or (d) added with 3% of vinylene carbonate (VC) additive.
